# Supplementary material
Source: publisher figshare collection journal article supplement (https://acs.figshare.com/ndownloader/files/21940287)
Supplement: Supplementary file 1 [file 21940287]

## Support Information

### Thermal Decomposition Characteristics and Thermal Safety of Dihydroxylammonium 5, 5'-Bistetrazole-1, 1'-Diolate Based on Microcalorimetric Experiment and Decoupling Method

Yabei Xu, Yingxin Tan\*, Weiguo Cao, Yuxin Zhao, Bin Tian

School of Environmental and Safety Engineering, North University of China, Taiyuan 030051, PR China

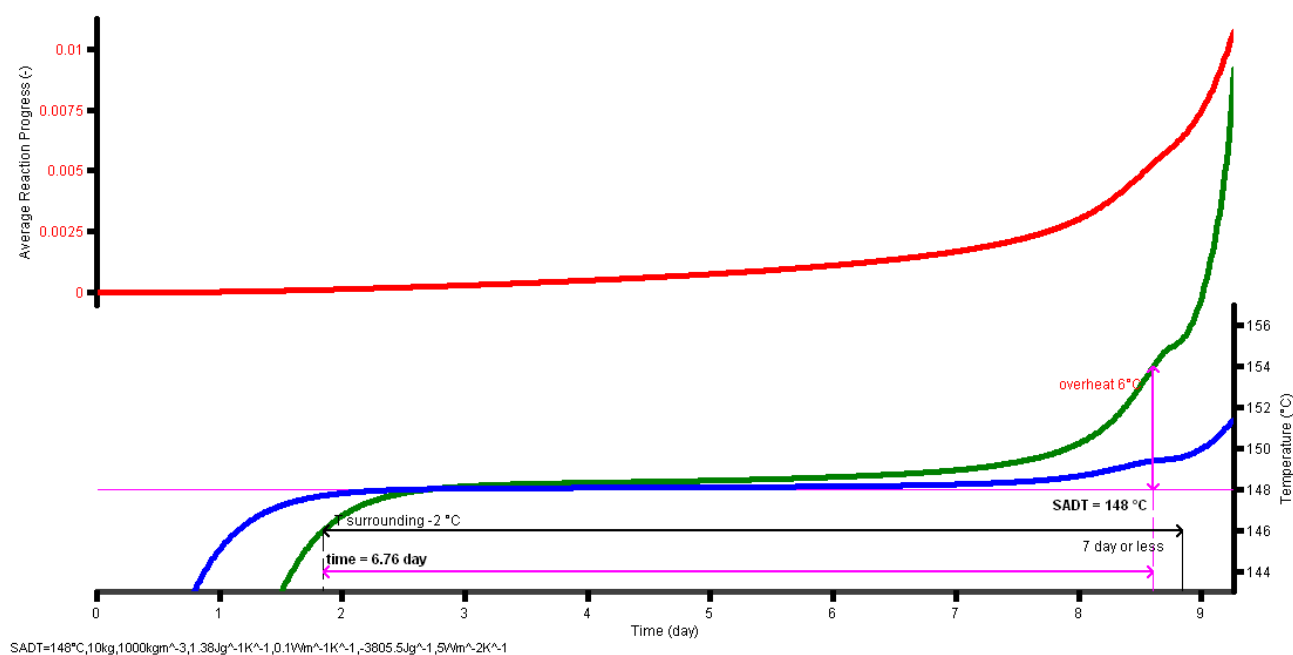

**Figure S1** Calculation results of TKX-50 self-accelerated decomposition temperature (10.0 kg, C600)

\*Corresponding author.

E-mail address: [nuctyxnuc@163.com](mailto:nuctyxnuc@163.com) (Y.X.Tan)

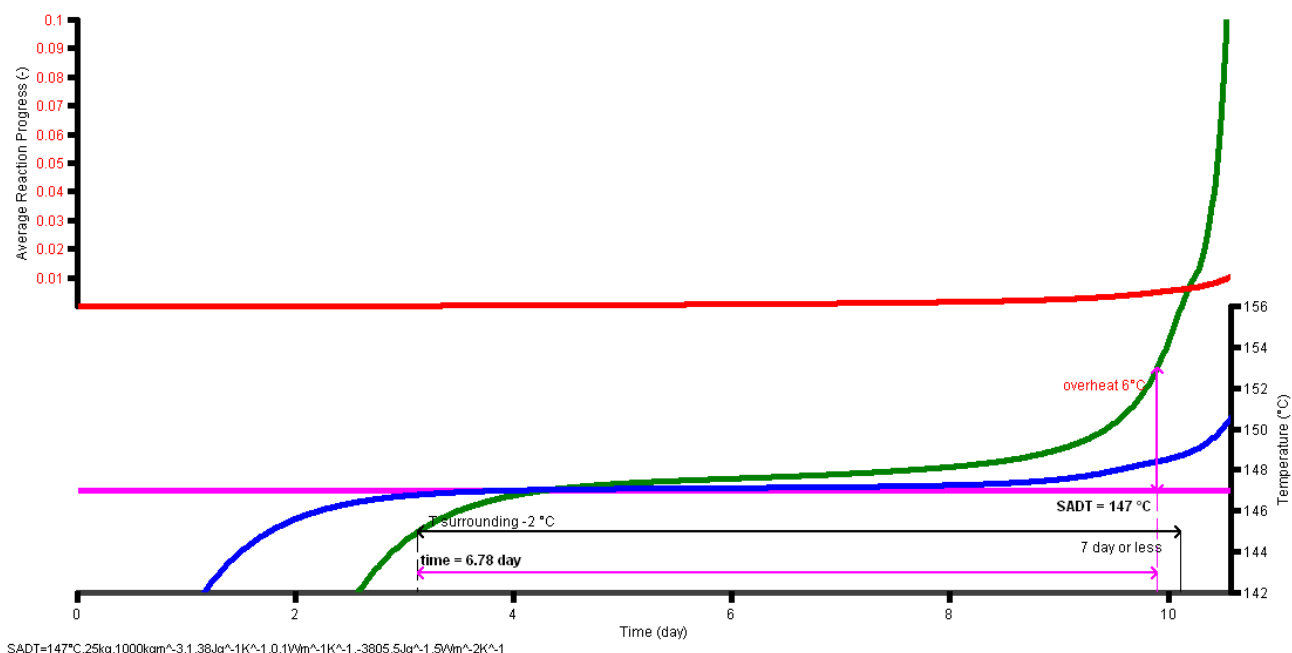

**Figure S2** Calculation results of TKX-50 self-accelerated decomposition temperature (25.0 kg, C600)

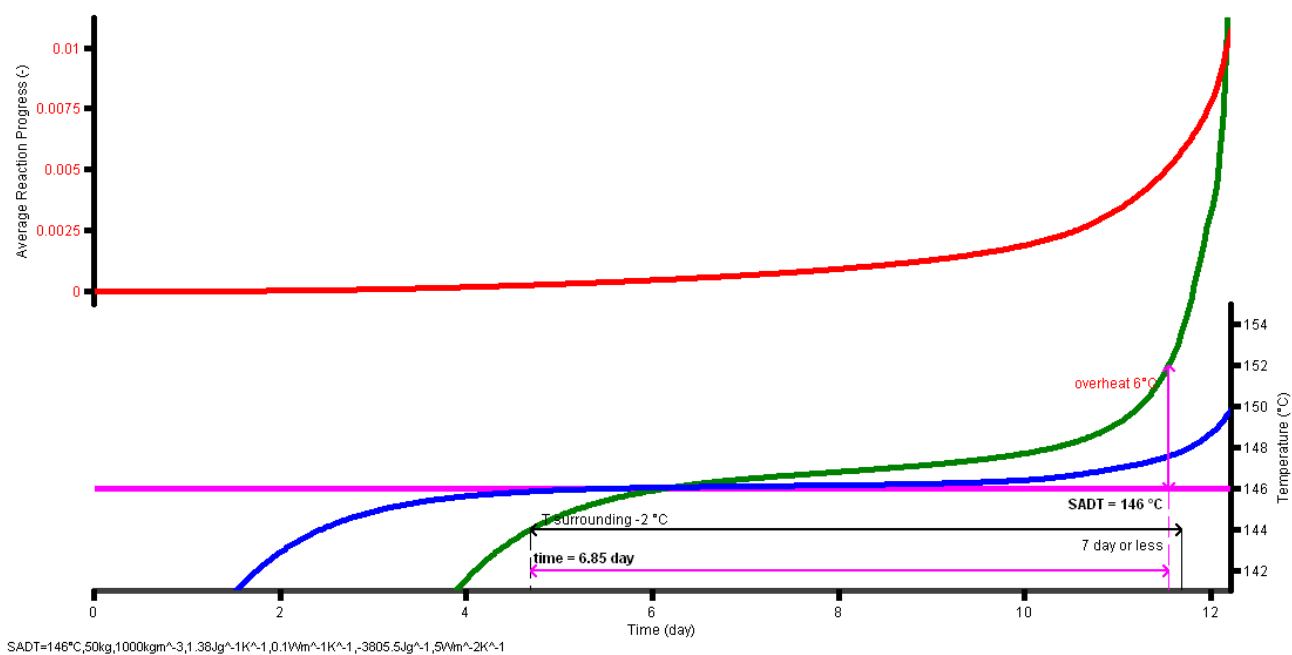

**Figure S3** Calculation results of TKX-50 self-accelerated decomposition temperature (50.0 kg, C600)

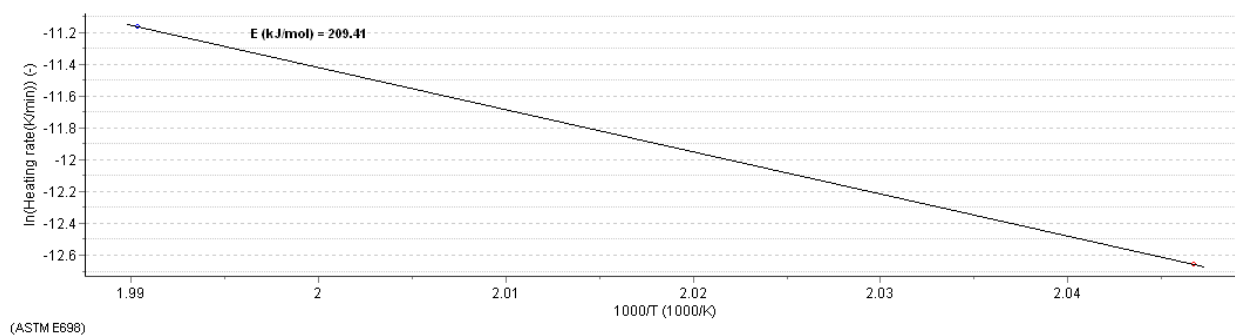

**Figure S4** The apparent activation energy fitting line ( isothermal conditions )

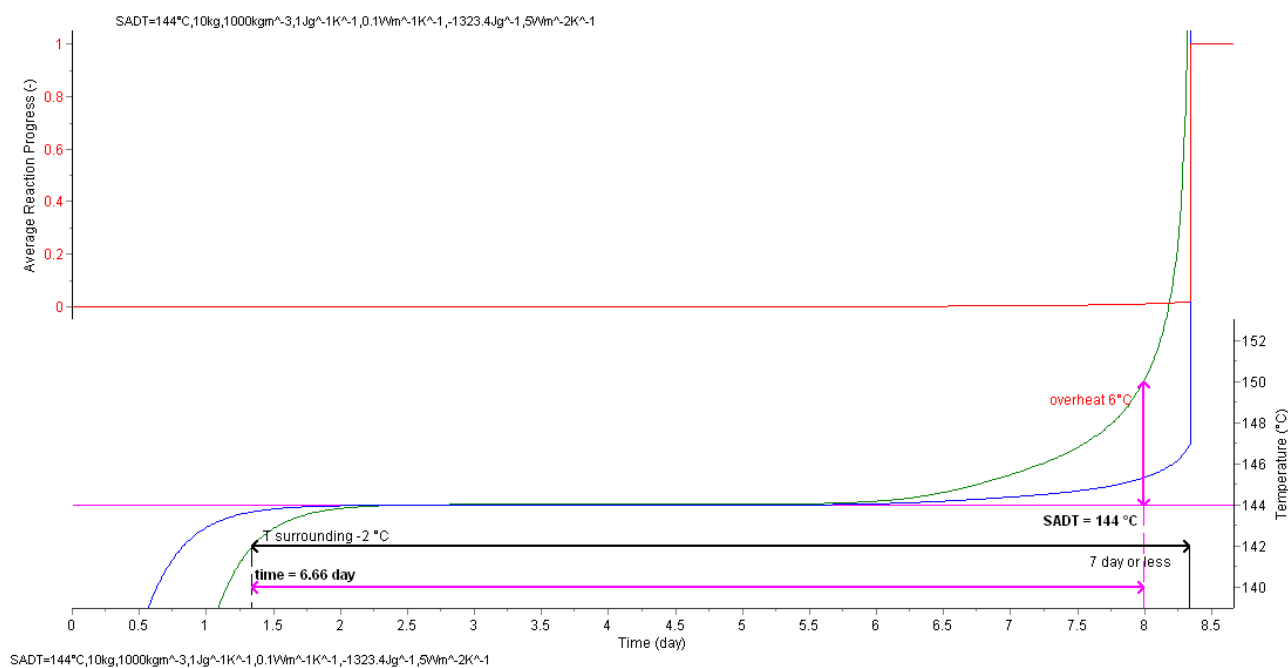

**Figure S5** Calculation results of TKX-50 self-accelerated decomposition temperature (10.0 kg, isothermal conditions)

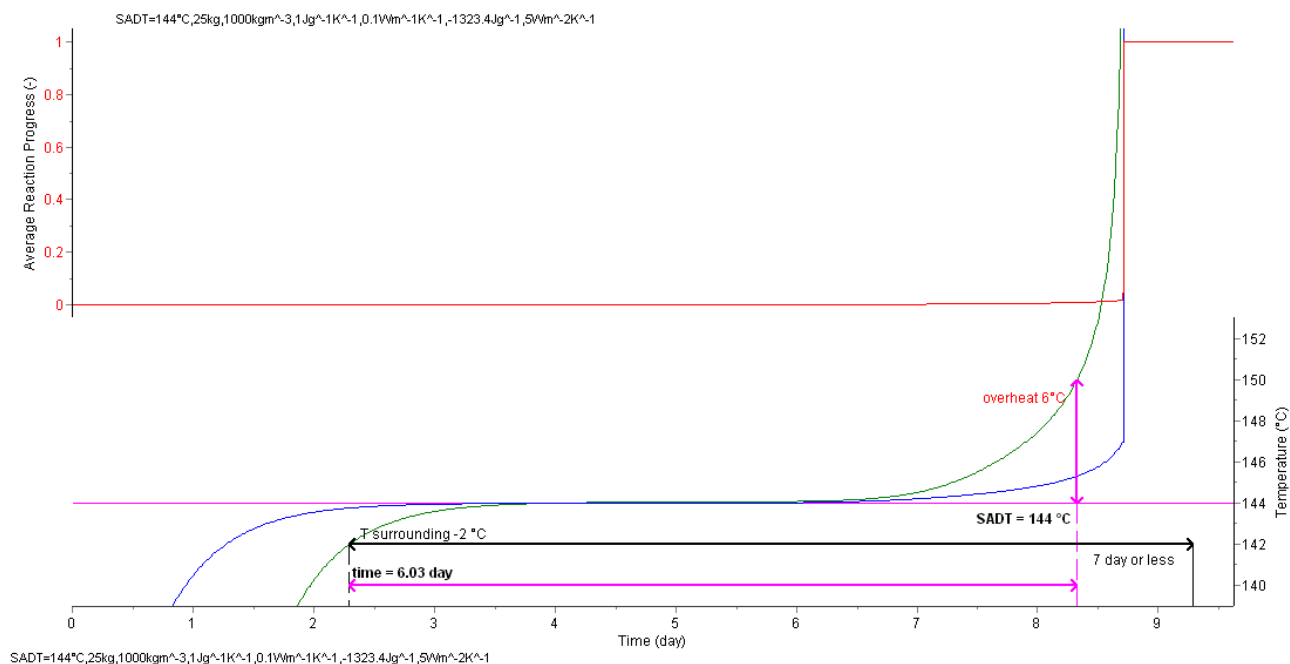

**Figure S6** Calculation results of TKX-50 self-accelerated decomposition temperature (25.0 kg, isothermal conditions)

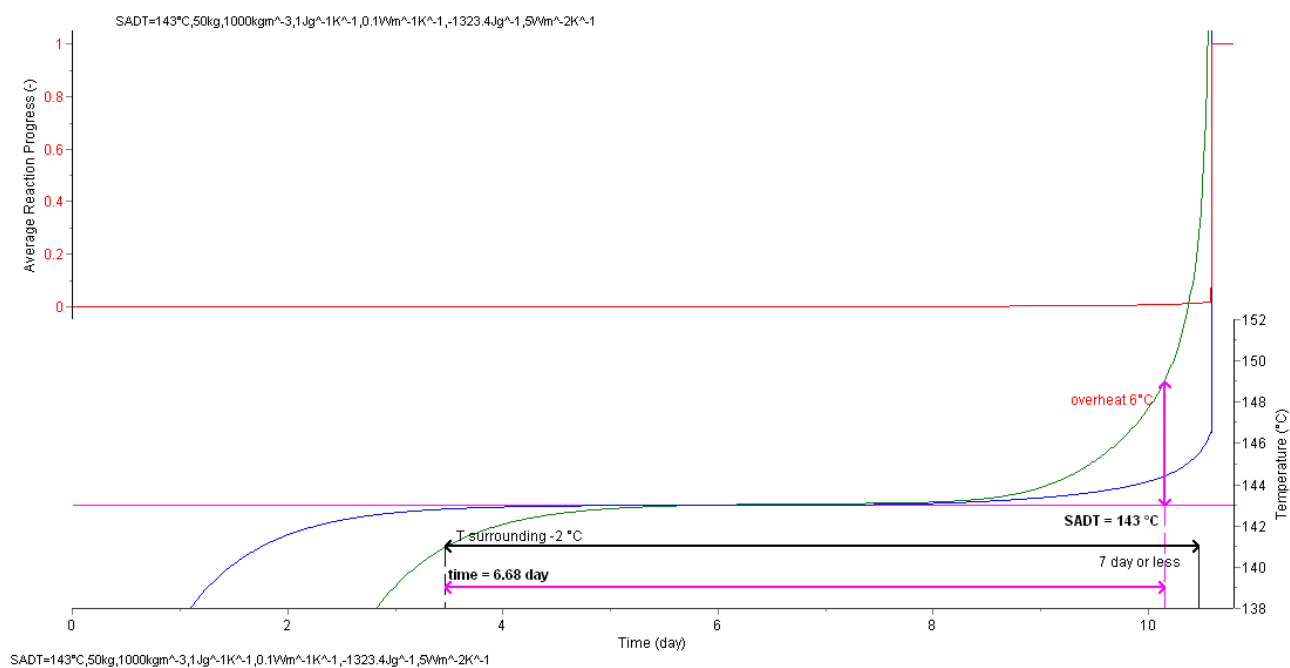

**Figure S7** Calculation results of TKX-50 self-accelerated decomposition temperature (50.0 kg, isothermal conditions)

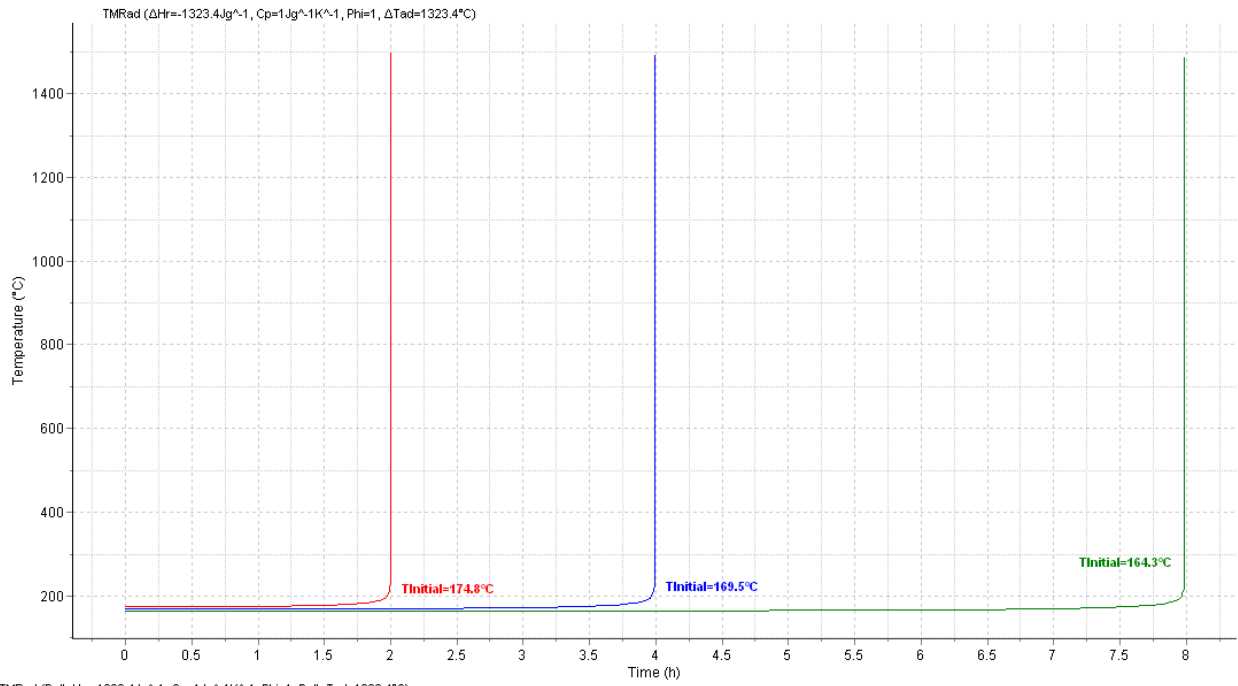

**Figure S8** Adiabatic temperature simulation of TKX-50 at different temperatures (isothermal conditions)

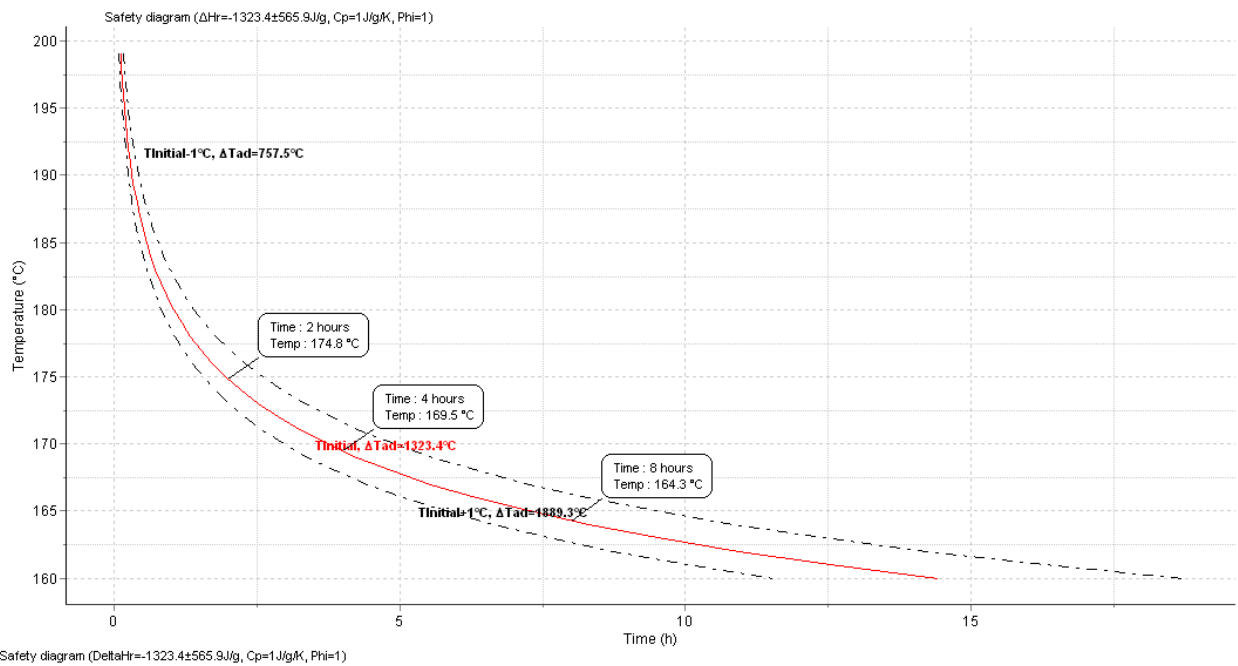

**Figure S9**  $TMR_{ad}$  of TKX-50 at different temperatures (isothermal conditions)



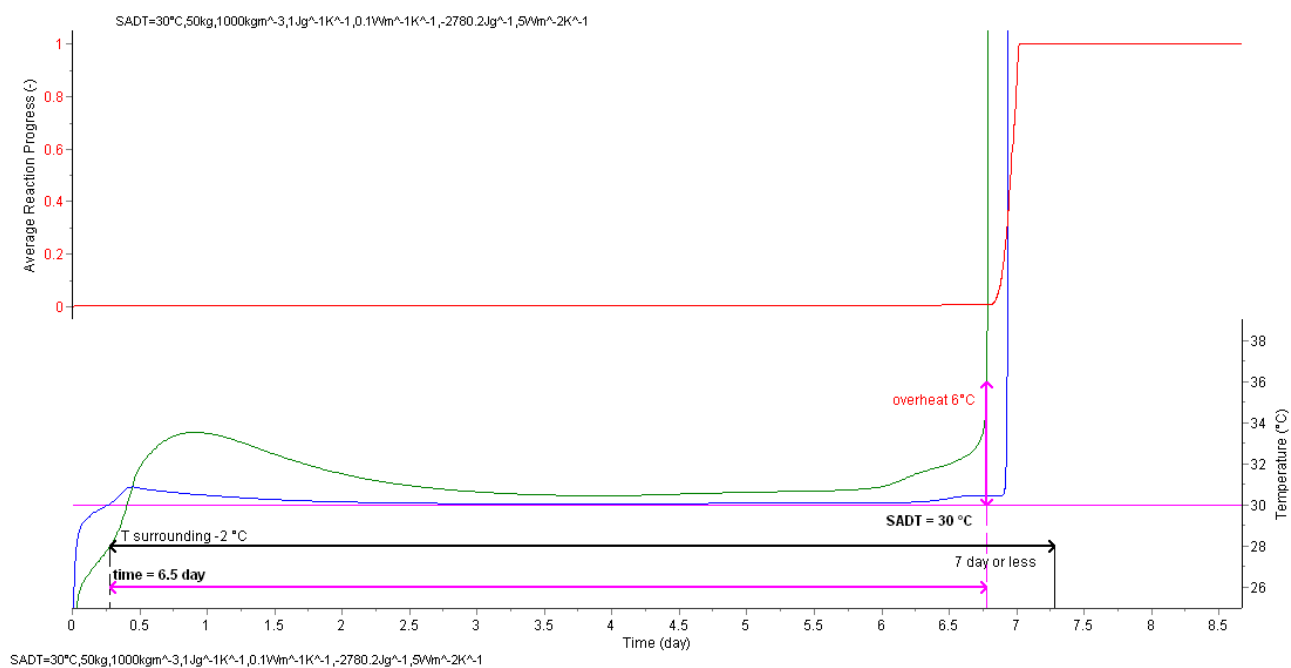

**Figure S12** Calculation results of TKX-50 self-accelerated decomposition temperature (50.0 kg, Thermal history conditions)
